# Supplementary material for: Structural reorganization of cylindrical nanoparticles triggered by polylactide stereocomplexation
Source: PubMed Central journal article supplement (PMC4281646; doi:10.1038/ncomms6746), 2014-12-17
Supplement: ncomms6746-s1.pdf [file ncomms6746-s1.pdf]

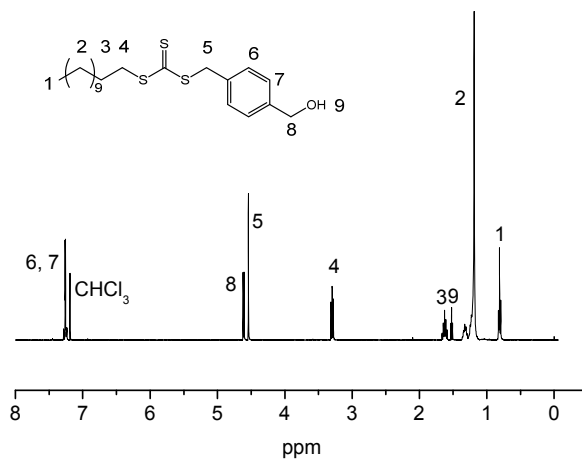

**Supplementary Figure 1.** <sup>1</sup>H NMR spectrum of dual-headed initiator dodecyl 4-(hydroxymethyl) benzyl carbonotrithioate (400 MHz, CDCl<sub>3</sub>).

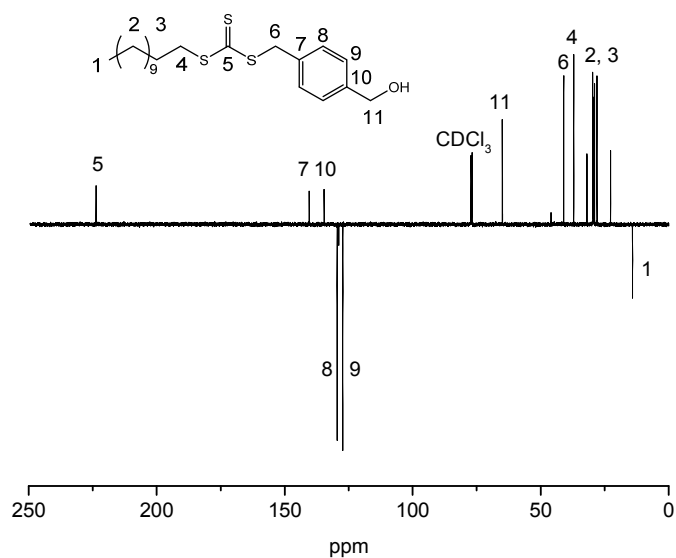

**Supplementary Figure 2.** <sup>13</sup>C NMR spectrum of dual-headed initiator dodecyl 4-(hydroxymethyl) benzyl carbonotrithioate (150 MHz, CDCl<sub>3</sub>).

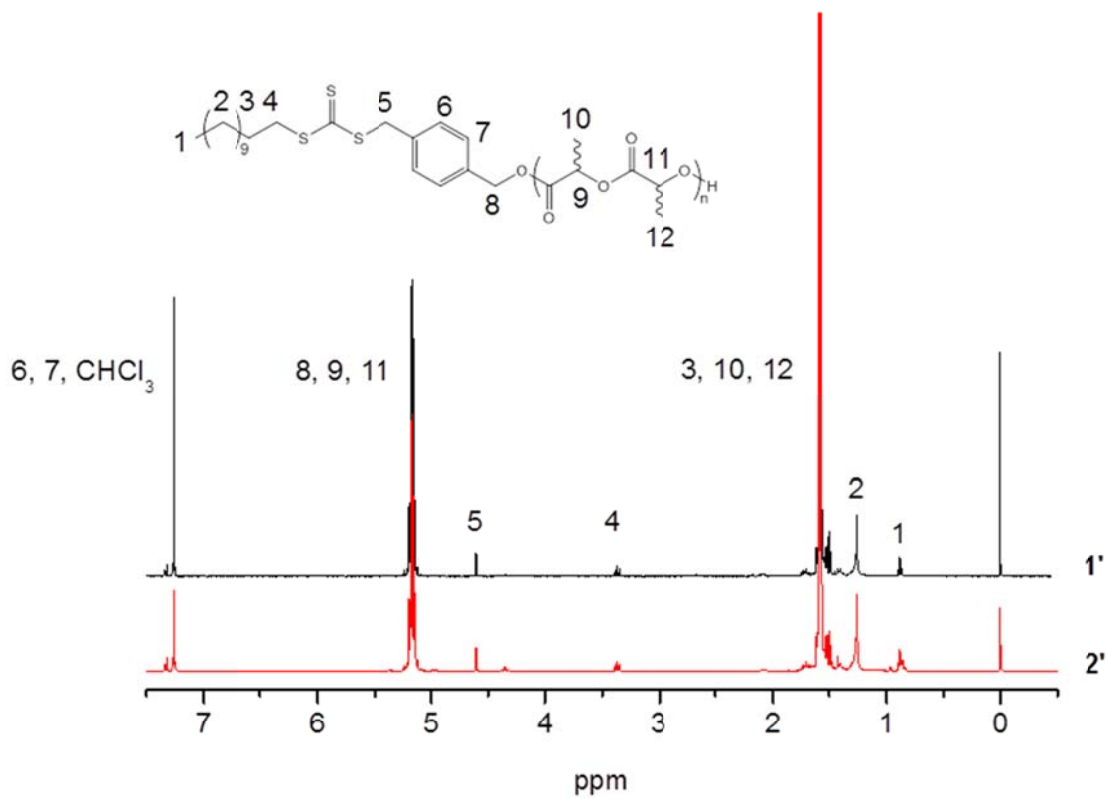

**Supplementary Figure 3.** <sup>1</sup>H NMR spectra of PLLA 1' and PDLA 2' (400 MHz, CDCl<sub>3</sub>).

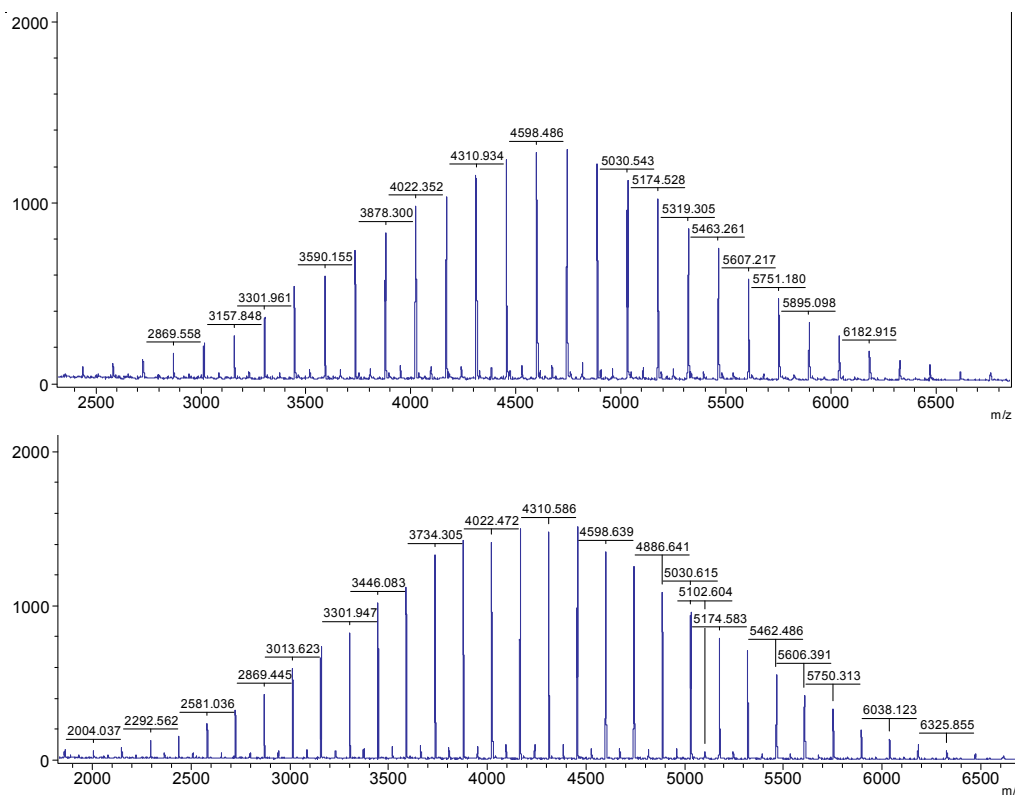

| DP | m/z calculated | DP | m/z calculated |
|----|----------------|----|----------------|
| 11 | 2005.6282      | 27 | 4310.3002      |
| 12 | 2149.6702      | 28 | 4454.3422      |
| 13 | 2293.7122      | 29 | 4598.3842      |
| 14 | 2437.7542      | 30 | 4742.4262      |
| 15 | 2581.7962      | 31 | 4886.4682      |
| 16 | 2725.8382      | 32 | 5030.5102      |
| 17 | 2869.8802      | 33 | 5174.5522      |
| 18 | 3013.9222      | 34 | 5318.5942      |
| 19 | 3157.9642      | 35 | 5462.6362      |
| 20 | 3302.0062      | 36 | 5606.6782      |
| 21 | 3446.0482      | 37 | 5750.7202      |
| 22 | 3590.0902      | 38 | 5894.7622      |
| 23 | 3734.1322      | 39 | 6038.8042      |
| 24 | 3878.1742      | 40 | 6182.8462      |
| 25 | 4022.2162      | 41 | 6326.8882      |
| 26 | 4166.2582      |    |                |

**Supplementary Figure 4.** MALDI-ToF mass spectra of macro-CTAs PLLA 1' and PDLA 2', showing minimal trans-esterification.

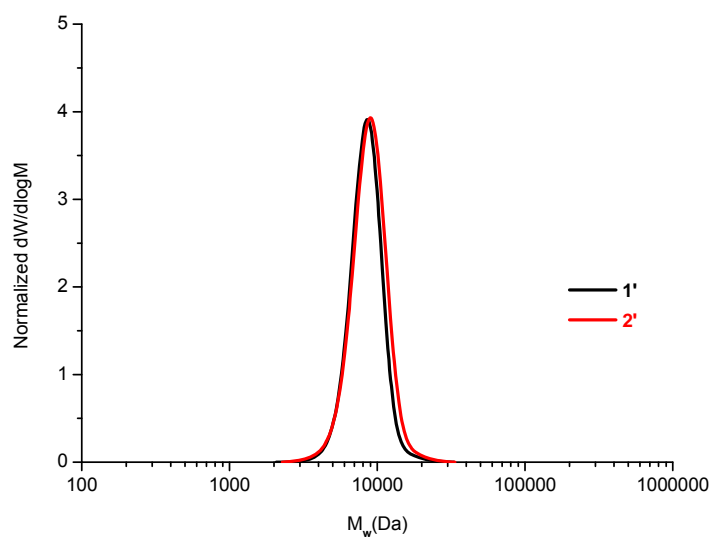

**Supplementary Figure 5.** SEC traces of PLLA **1'** and PDLA **2'** (THF with 2% TEA as eluent, RI detection).

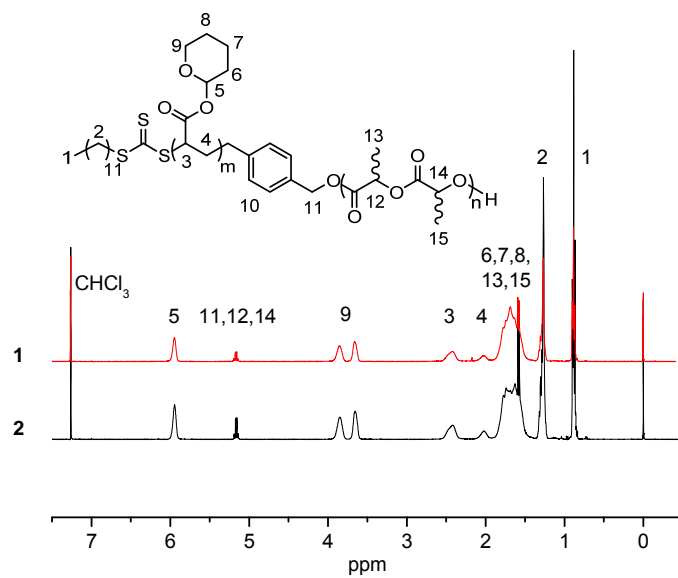

**Supplementary Figure 6.**  $^1\text{H}$  NMR spectra of diblock copolymers **1** and **2** (400 MHz,  $\text{CDCl}_3$ ).

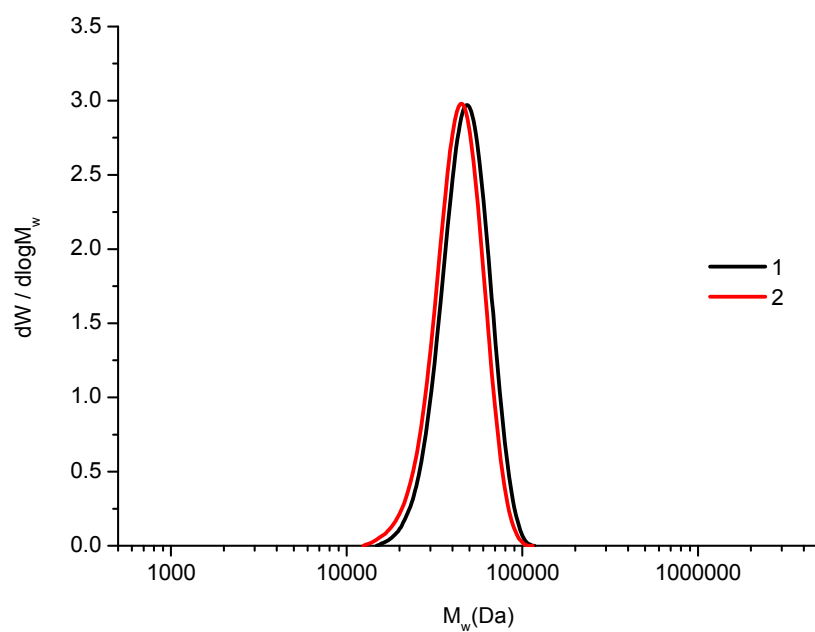

**Supplementary Figure 7.** SEC traces of **1** and **2** ( $\text{CHCl}_3$  with 0.5 % TEA as eluent, RI detection).

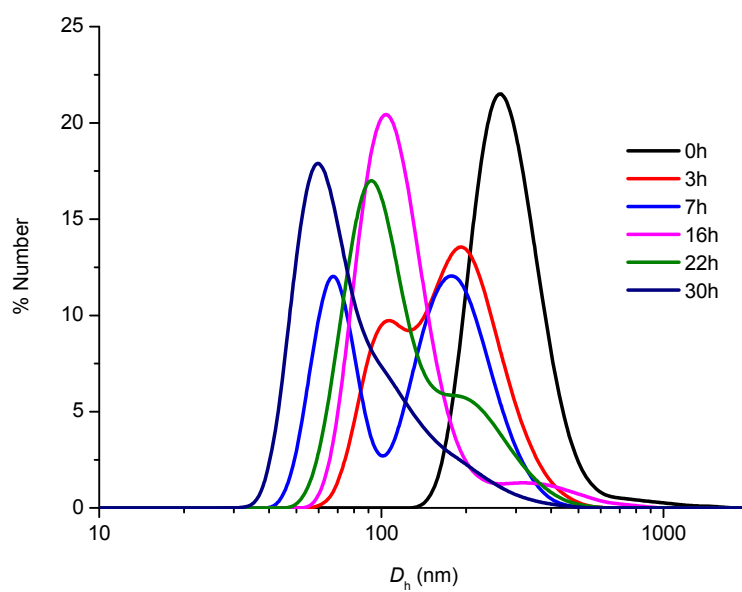

**Supplementary Figure 8.** DLS data showing that the size of the two homochiral cylinders (**3** and **4** when mixed in a 1:1 ratio with the addition of 20% THF) decreased gradually when mixed together and heated at 65 °C over time.

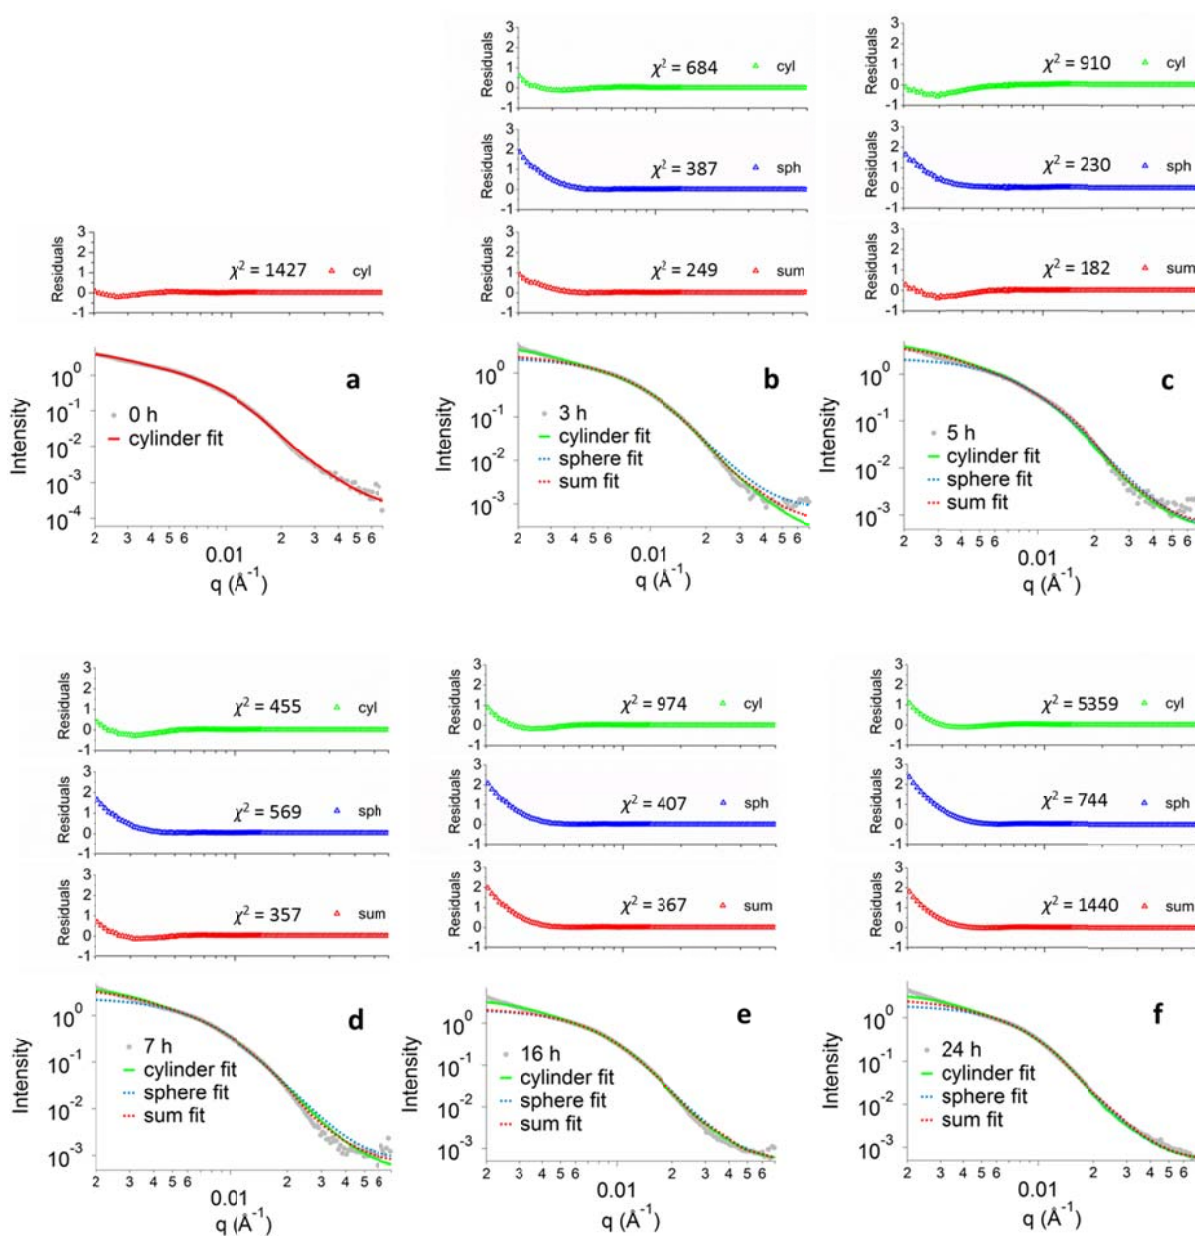

**Supplementary Figure 9.** SAXS profiles, fits, residuals and  $\chi^2$  values for the assembly of the mixture of the 2 homochiral cylinders in the presence of THF. Residuals for the sphere model are not well distributed.  $\chi^2$  values are better for the sum model than the cylindrical model, which confirms the presence of spherical micelles in the solution.

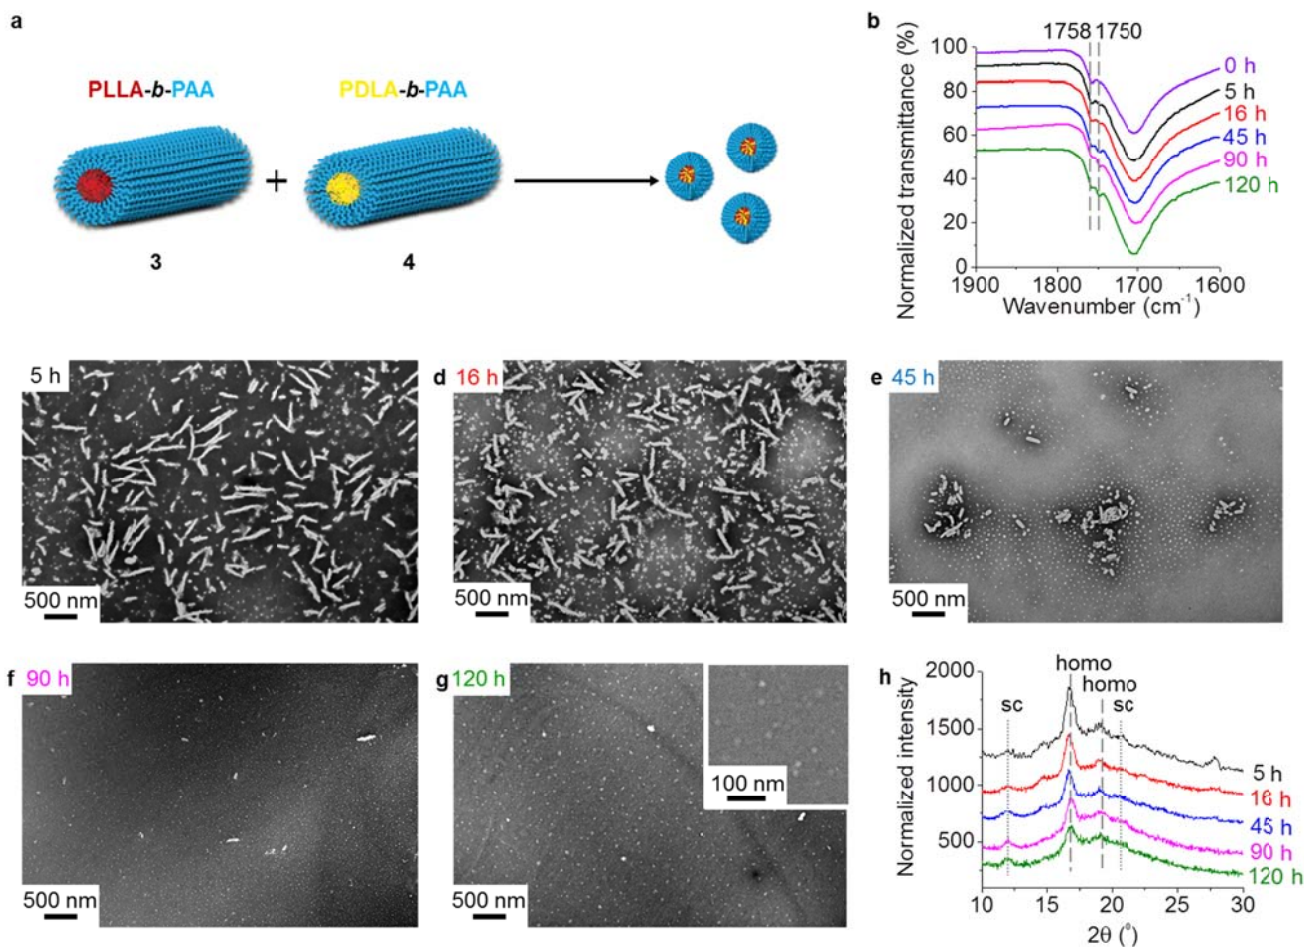

**Supplementary Figure 10.** Characterization data of the morphological transition and the changes in the crystalline core nature when the two homochiral cylinders **3** and **4** were mixed at 65 °C without the addition of fresh THF. **a**, Cartoon illustrations showing the morphological transition from homochiral cylinders **3** and **4** to stereocomplex spheres. **b**, FT-IR spectra of dried nanoparticles which reveal the wavenumber of carbonyl group vibration of poly(lactide) shifted from 1758  $\text{cm}^{-1}$  to 1750  $\text{cm}^{-1}$  over time. **c-g**, TEM images which illustrate the length of the cylindrical micelles decreased while the population of spherical micelles increased over time. **h**, WAXD diffractograms showed that the intensity of the homochiral Bragg peak at  $16.6^\circ$  decreased gradually while the intensity of stereocomplex Bragg peak at a  $2\theta$  of  $12^\circ$  increased slightly. The absence of a good solvent (THF) which hindered the poly(lactide) chain folding and stereocomplexation was proposed to explain the weak intensity of the stereocomplex Bragg peak. TEM samples were prepared by slow drying and negatively stained using PTA.

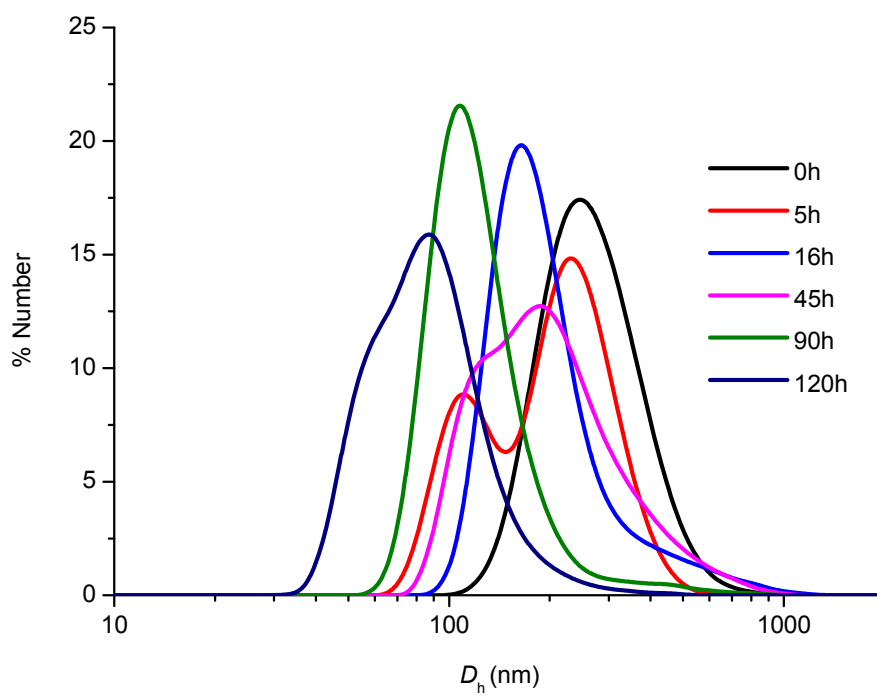

**Supplementary Figure 11.** DLS data showing that the size of the two homochiral cylinders (**3** and **4** when mixed in a 1:1 ratio without the addition of THF) decreased gradually when mixed together and heated at 65 °C over time.



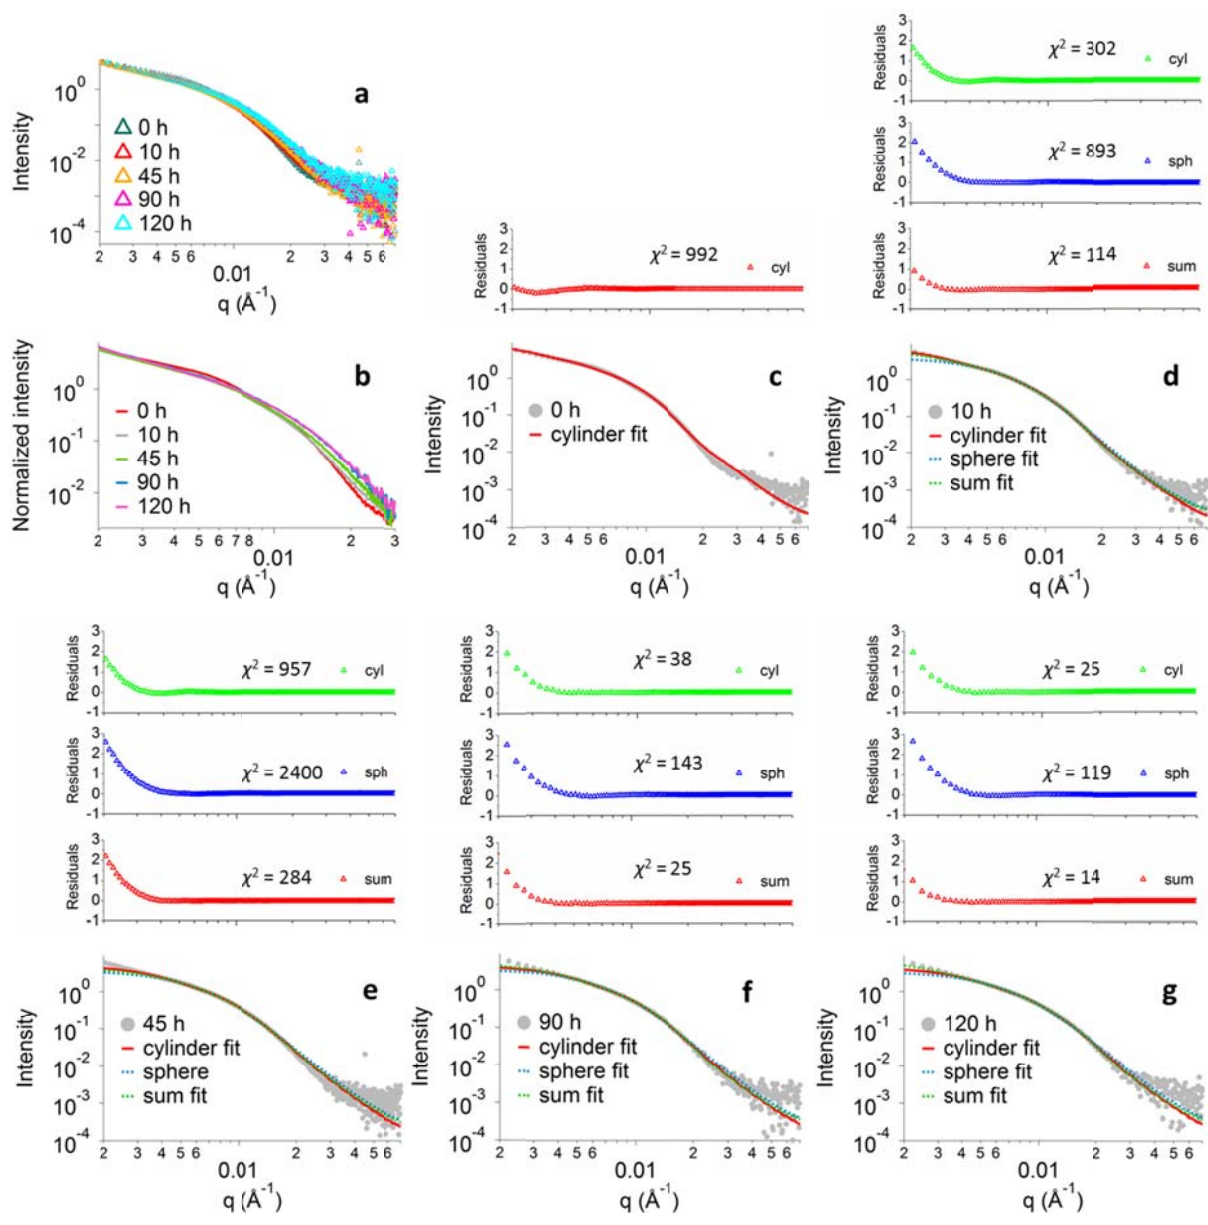

**Supplementary Figure 12.** SAXS experimental profiles and fittings of the morphological transition from the two homochiral cylinders to stereocomplex spheres at 65 °C without the addition of fresh THF at the beginning of the self-assembly. **a**, SAXS experimental profiles during the entire self-assembly process. **b**, A zoom-in figure in the  $q$  range of 0.002 to 0.03  $\text{\AA}^{-1}$ . **c-g**, Fittings of experimental profiles by using models “cylinder polyradius”, “poly core” and a linear combination of these two models. The fitted parameters are given in Supplementary Table 3.

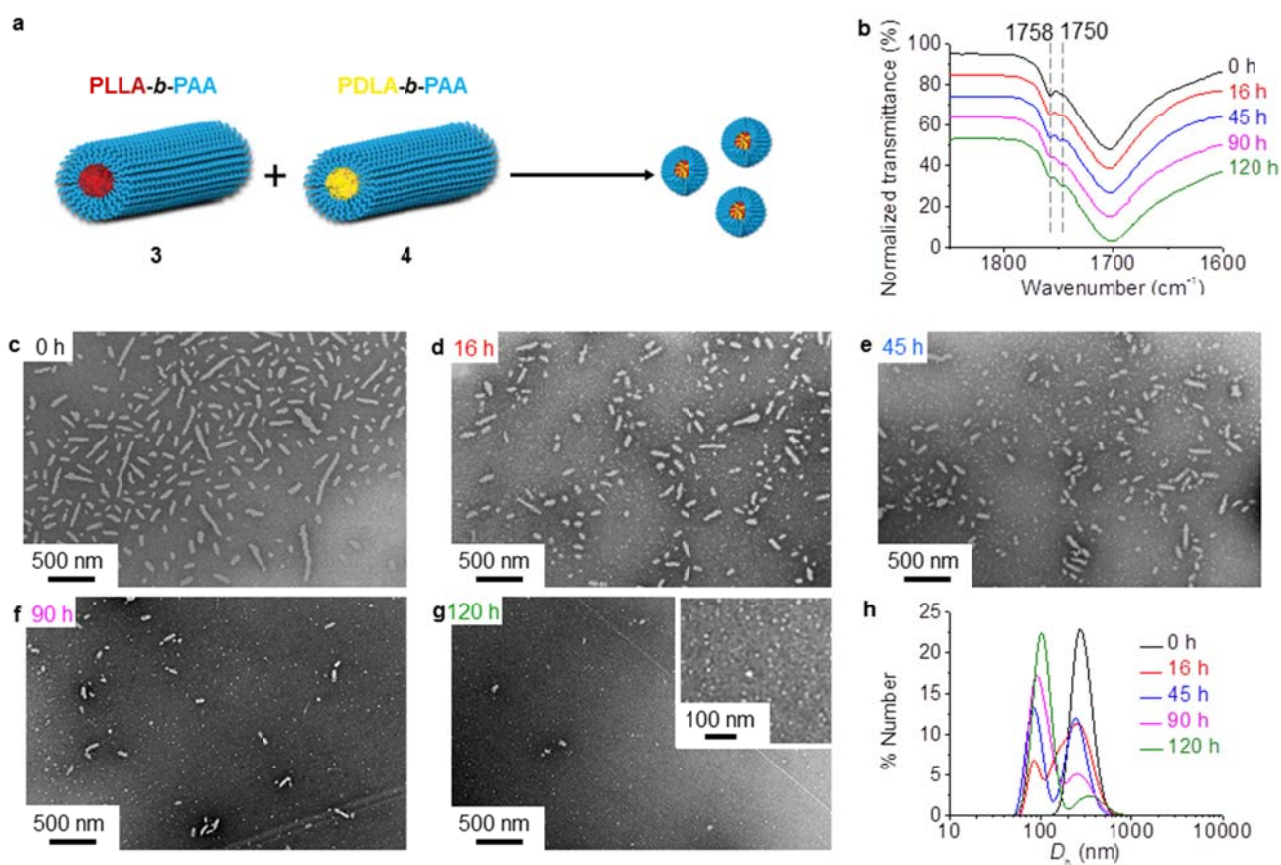

**Supplementary Figure 13.** Characterization data of the morphological transition when the two homochiral cylinders **3** and **4** (following freeze-drying to remove residual THF) were mixed at 65 °C in nanopure water without the addition of fresh THF. **(a)** Cartoon illustration showing the morphological transition from homochiral cylinders **3** and **4** to stereo-complex spheres. **(b)** FT-IR spectra of dried nanoparticles which reveal the wavenumber of carbonyl group vibration of poly(lactide) shifted from 1758 to 1750 cm<sup>-1</sup> over time. **(c-g)** TEM images which illustrate the length of the cylindrical micelles decreased while the population of spherical micelles increased over time. **(h)** DLS analysis confirmed the hydrodynamic diameter decreased during the morphological transition. TEM samples were prepared by slow drying and negatively stained using PTA.

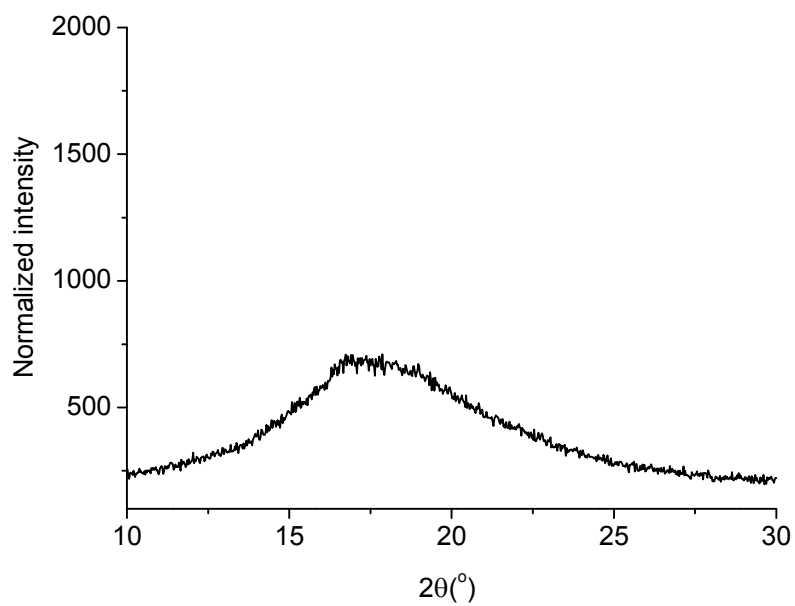

**Supplementary Figure 14.** WAXD diffractogram showing the amorphous nature of spherical micelles obtained from the self-assembly of **1**.

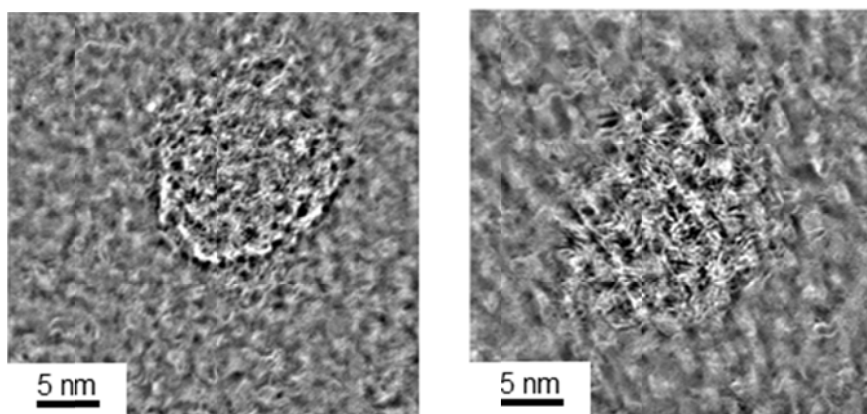

**Supplementary Figure 15.** EWR phase image of a stereocomplex spherical micelle (**a**, obtained from the mixture of homochiral cylinders **3** and **4**) and an amorphous spherical micelle (**b**, obtained from the self-assembly of **1**) respectively.

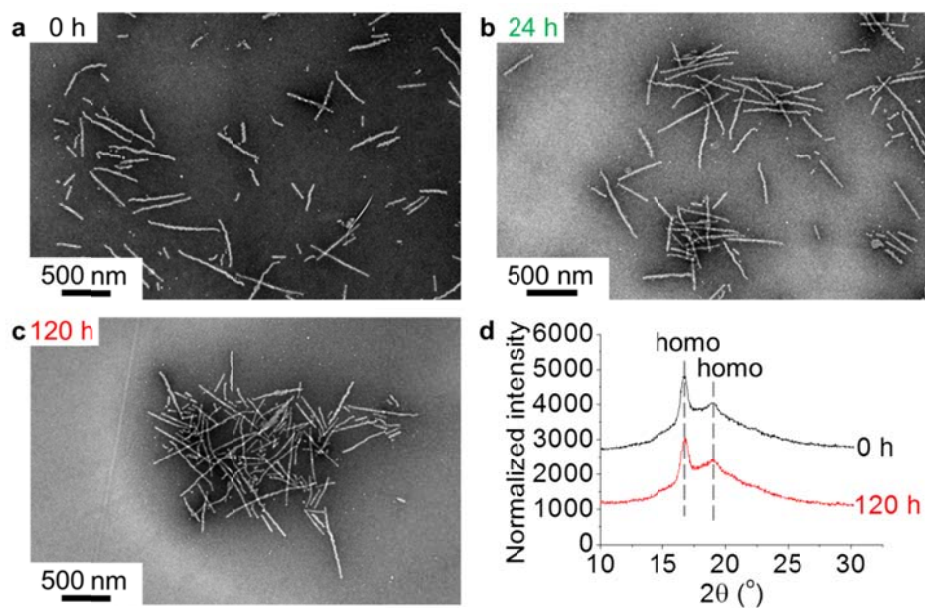

**Supplementary Figure 16.** a-c, TEM images showing that the lengths of homochiral cylinders 3 did not change significantly when heated at 65  $^\circ\text{C}$  for 120 h. d, WAXD diffractograms showing there is no significant difference in the intensity of the homochiral Bragg peak at a  $2\theta$  value of 16.6 $^\circ$  over this time. No stereocomplex Bragg peaks were observed during the entire self-assembly. TEM samples were prepared by slow drying and negatively stained using PTA.

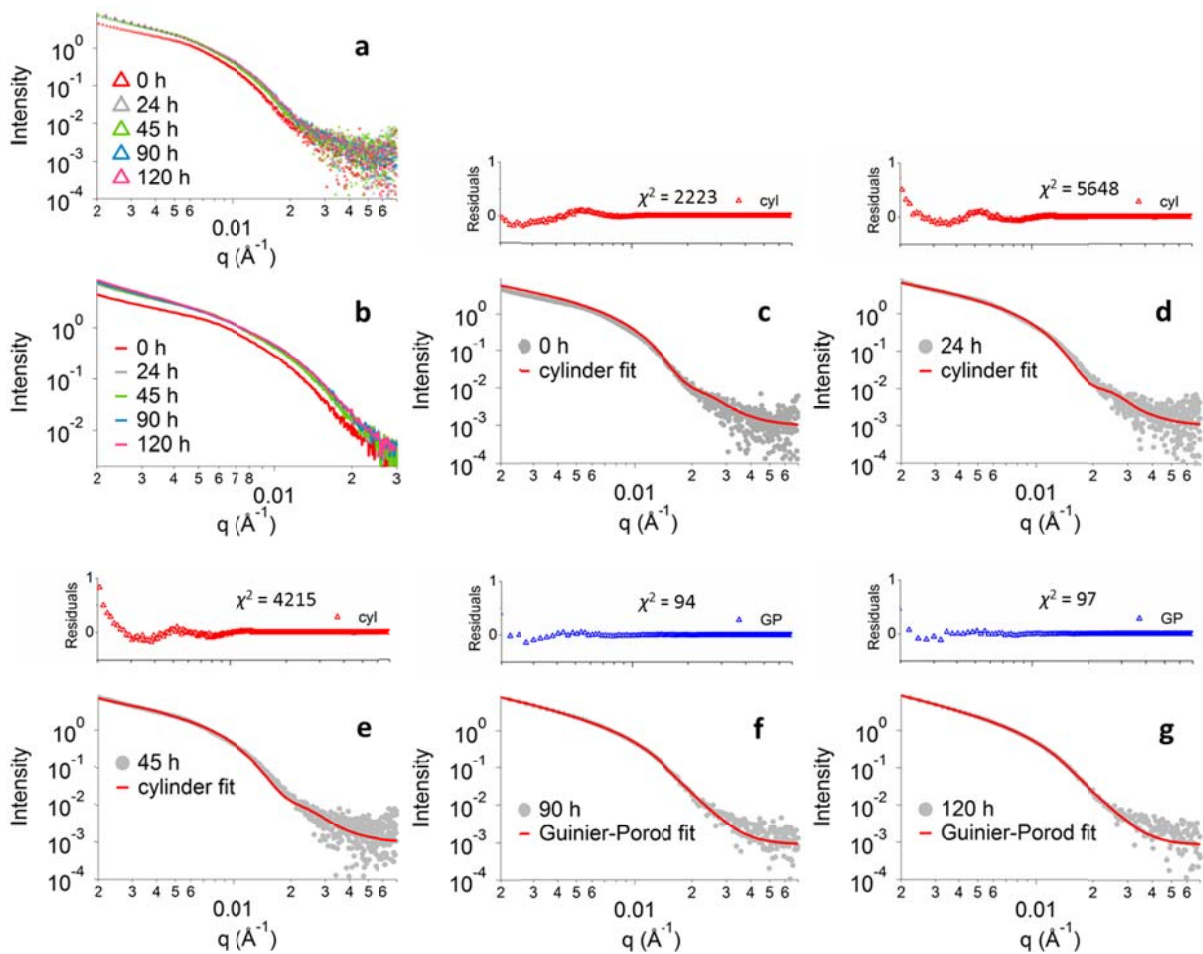

**Supplementary Figure 17.** SAXS profiles and fittings showing that the size of cylindrical micelles 3 did not change obviously over heating. **a**, SAXS experimental profiles during the entire self-assembly process. **b**, A zoom-in figure in the  $q$  range of 0.002 to 0.03  $\text{\AA}^{-1}$ . **c-e**, Fittings of experimental profiles by using the cylindrical model. **f-g** Fittings of experimental profiles by using the Guinier-Porod model; some aggregations of the particles were observed and the cylindrical model does not provide correct fits for 90 and 120 h. The parameters of the fitted curves are listed in Supplementary Table 4.

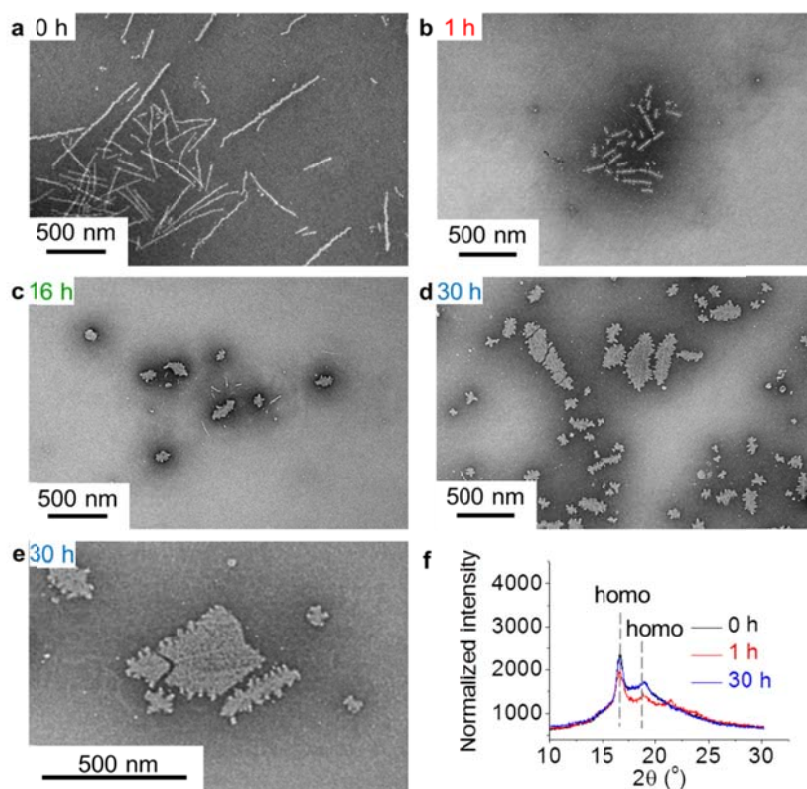

**Supplementary Figure 18.** TEM images showing that the structure of cylinders 3 changed significantly over time, with heating at 65 °C and with the addition of fresh THF: **a**, Cylindrical micelles before addition of fresh THF. **b**, The length of cylinders decreased dramatically due to dissolution in the THF/water mixture. **c** and **d**, The disassembled unimers gradually inserted into the undestroyed cylinders and lamellar structures were formed; **e**, Numerous small “arms” were noticed protruding the lamellar micelles. **f**, Overlaid WAXD diffractograms showing that the intensity of homochiral Bragg peak at a  $2\theta$  value of  $16.6^\circ$  decreased after addition of fresh THF but recovered after 30 h due to the unimer growth onto the short cylindrical seeds. No stereocomplexation peaks were observed during the self-assembly. TEM samples were prepared by slow drying and negatively stained by PTA.

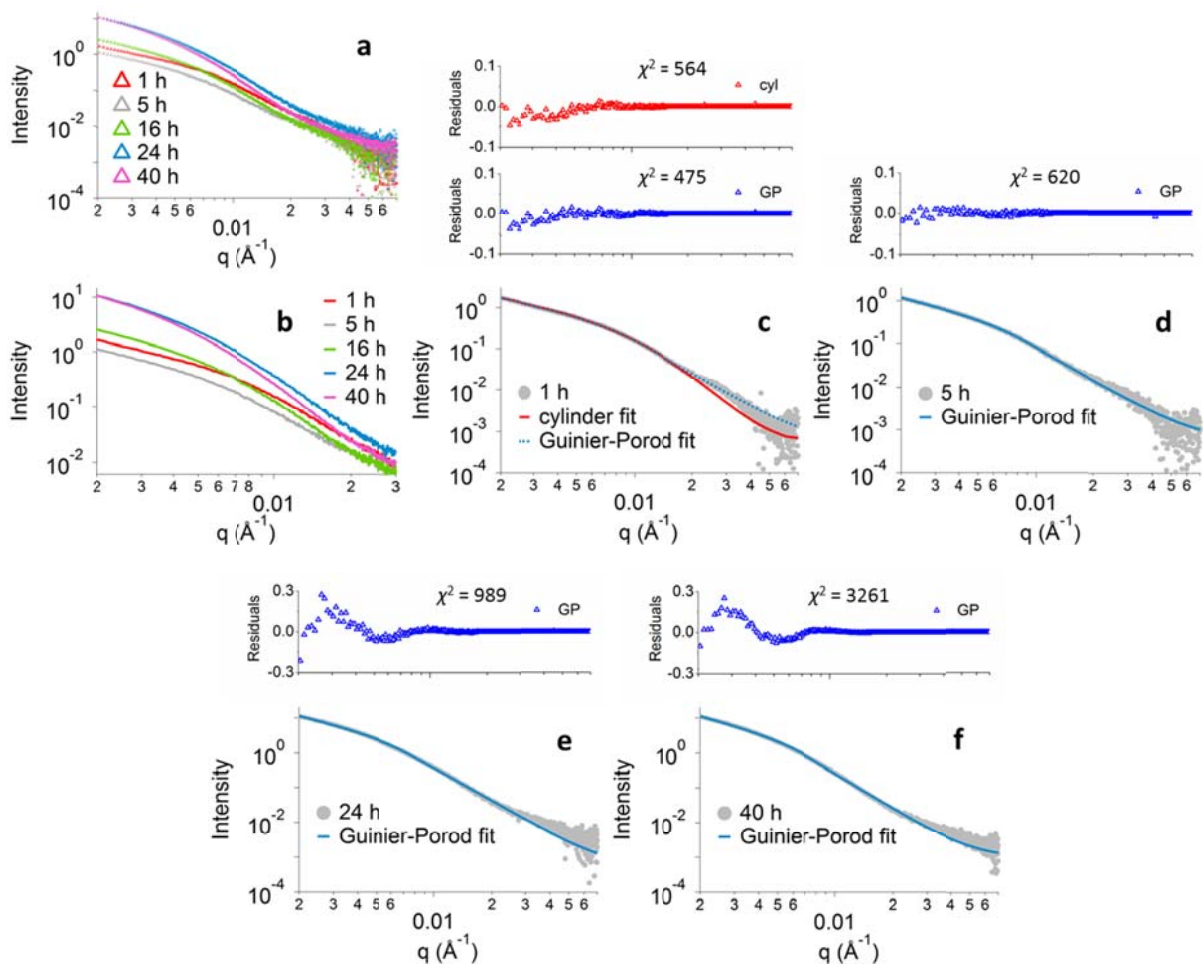

**Supplementary Figure 19.** SAXS profiles and fittings showing that the structure of cylinders 3 changed significantly into lamellar particles over time after addition of fresh THF and heating at 65 °C. **a**, SAXS experimental profiles during the entire self-assembly process. **b**, A zoom-in figure in the  $q$  range of 0.002 to 0.03 Å<sup>-1</sup>. **c**, Fittings of experimental profile by using the cylindrical model and the Guinier-Porod model. **d-f** Fittings of experimental profiles by using the Guinier-Porod model to provide basic information on the general shape of the assemblies. The cylindrical model does not provide a good fit after 5 hrs of heating. The parameters of the fitted curves are listed in Supplementary Table 5.

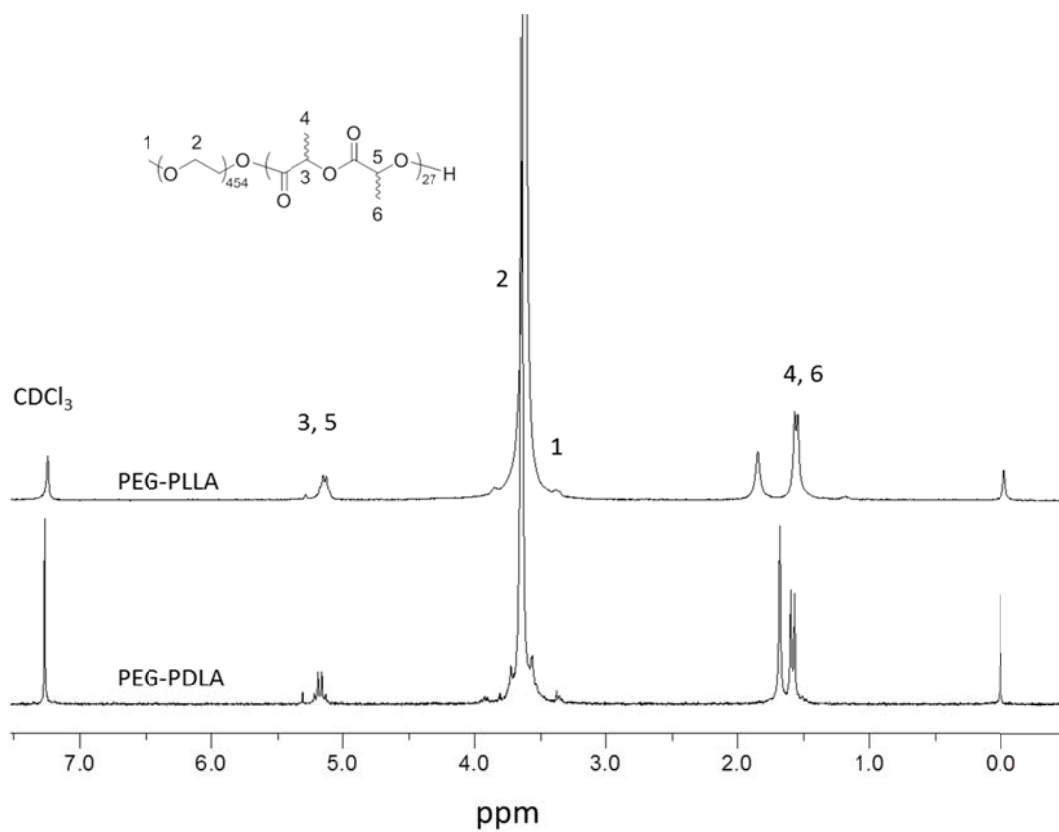

**Supplementary Figure 20.** <sup>1</sup>H NMR spectrum of PEG-*b*-PDLA and PEG-*b*-PLLA copolymers (300 MHz, CDCl<sub>3</sub>).



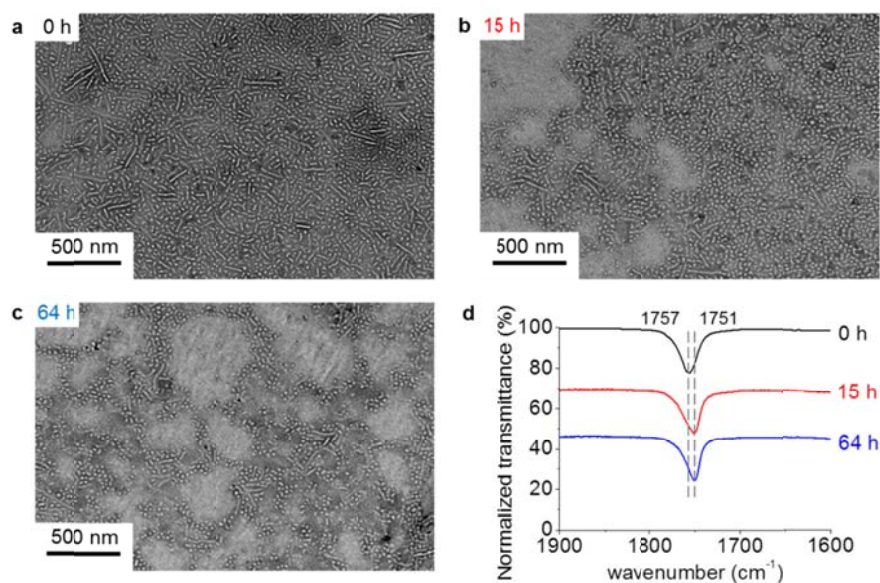

**Supplementary Figure 21.** Characterization data of the morphological transition and the changes in the crystalline core nature when the two homochiral PLLA-b-PEO cylinder and PDLA-b-PEO cylinder were mixed at 65 °C with the addition of fresh THF. **a-c**, TEM images which illustrate the length of the cylindrical micelles decreased while the population of spherical micelles increased over time. **d**, FT-IR spectra of dried nanoparticles which reveal the wavenumber of carbonyl group vibration of poly(lactide) shifted from 1757  $\text{cm}^{-1}$  to 1751  $\text{cm}^{-1}$  over time. TEM samples were prepared by slow drying and negatively stained by PTA.

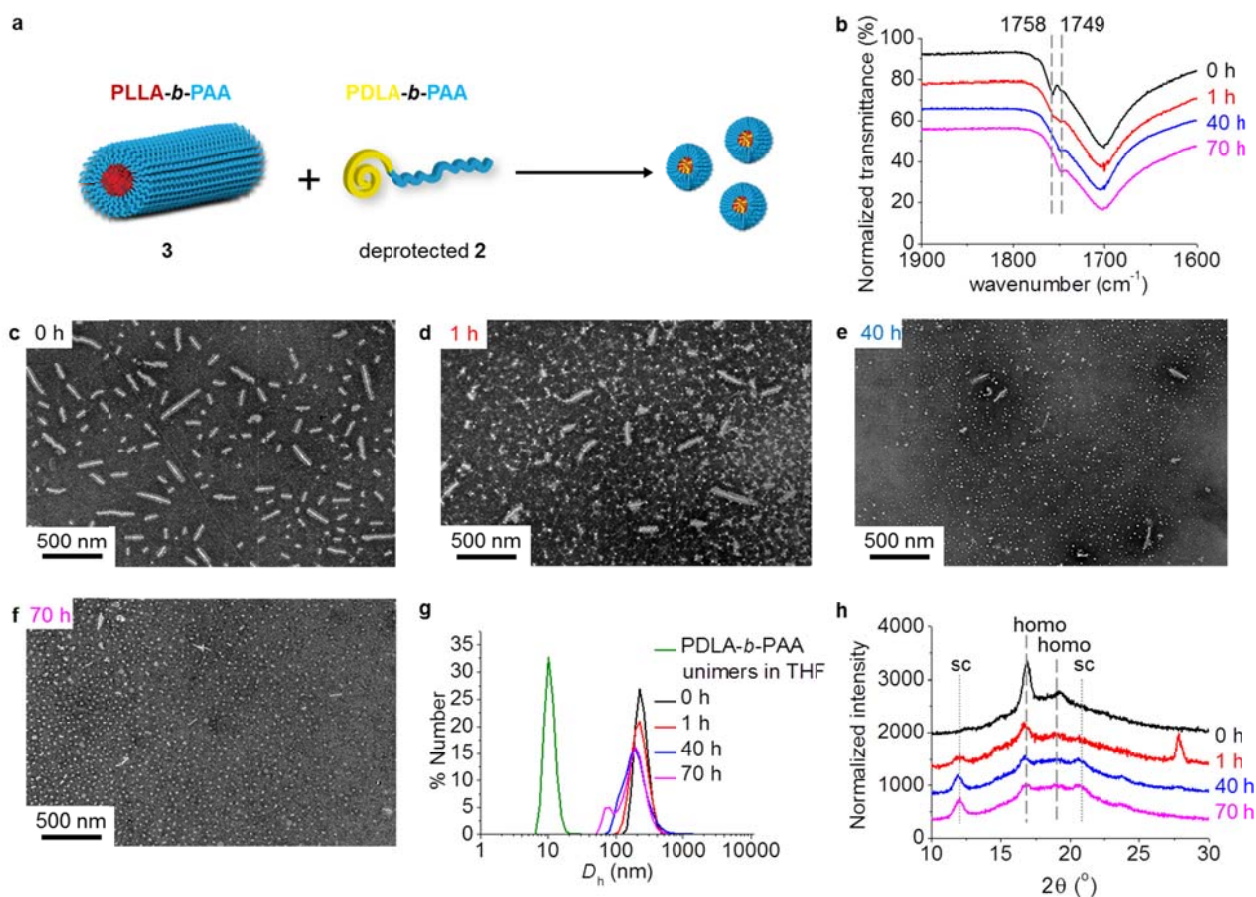

**Supplementary Figure 22.** Characterization data of the morphological transition and the changes in the crystalline core nature when the THF solution of PDLA-*b*-PAA unimers was added into aqueous solution of PLLA-*b*-PAA cylinder 3 at 65 °C. **a**, Cartoon illustrations showing the morphological transition. **b**, FT-IR spectra of dried nanoparticles which reveal the wavenumber of carbonyl group vibration of poly(lactide) shifted from 1758  $\text{cm}^{-1}$  to 1749  $\text{cm}^{-1}$  over time. **c-f**, TEM images which illustrate the length of the cylindrical micelles decreased while the population of spherical micelles increased over time. **g**, DLS data which indicate the morphological transition over time. **h**, WAXD diffractograms showed that the intensity of the homochiral Bragg peak at a  $2\theta$  value of  $16.6^\circ$  decreased significantly while the intensity of stereocomplex Bragg peak at a  $2\theta$  value of  $12^\circ$  increased gradually. TEM samples were prepared by slow drying and negatively stained using PTA.

**Supplementary Table 1.** Characterization data of various poly(lactide) macro-CTAs and diblock copolymers

| Polymer                                                      | $M_n$ (kDa) <sup>a</sup> | $D_M$             | Hydrophobic weight fraction (%) <sup>d</sup> |
|--------------------------------------------------------------|--------------------------|-------------------|----------------------------------------------|
| PLLA <sub>31</sub> <b>1'</b>                                 | 4.7                      | 1.07 <sup>b</sup> | —                                            |
| PDLA <sub>28</sub> <b>2'</b>                                 | 4.3                      | 1.08 <sup>b</sup> | —                                            |
| PLLA <sub>31</sub> - <i>b</i> -PTHPA <sub>332</sub> <b>1</b> | 54.9                     | 1.10 <sup>c</sup> | 15.7                                         |
| PDLA <sub>28</sub> - <i>b</i> -PTHPA <sub>315</sub> <b>2</b> | 52.0                     | 1.11 <sup>c</sup> | 15.1                                         |

<sup>a</sup> Measured by <sup>1</sup>H NMR spectroscopy (400 MHz, CDCl<sub>3</sub>). <sup>b</sup> Measured by THF SEC. <sup>c</sup> Measured by CHCl<sub>3</sub> SEC. <sup>d</sup> PLA weight fraction in the final PLA-*b*-PAA diblock copolymer.

**Supplementary Table 2.** Detailed analysis of the fitted SAXS profiles given in Figure 4 for the assembly of the mixture of the 2 homochiral cylinders. The initial time point experiment profile (t = 0 h) has been fitted with a cylinder model, all the other subsequent profiles with the sum model<sup>a</sup>

| time (h) | length of cylinder (nm) | radius of cylinder (nm) | radius of sphere (nm) | scale ratio of cylinder:sphere <sup>b</sup> |
|----------|-------------------------|-------------------------|-----------------------|---------------------------------------------|
| 0        | 191 ± 2                 | 13 ± 0.1                | -                     | -                                           |
| 3        | 169 ± 1                 | 13 ± 3                  | 12 ± 6                | 1:0.25                                      |
| 5        | 150 ± 5                 | 25 ± 25                 | 13 ± 4                | 1:5.75                                      |
| 7        | 146 ± 2                 | 25 ± 4                  | 14 ± 2                | 1:5                                         |
| 16       | 131 ± 10                | 13 ± 3                  | 13 ± 2                | 1:120                                       |
| 24       | 129 ± 1                 | 20 ± 2                  | 12 ± 1                | 1: 33                                       |

<sup>a</sup> These data have been fitted with cylindrical, sphere and sum models. While the cylindrical model showed a decrease of length of the cylinders over time fits were good at low  $q$  but not as good at  $q$  higher than  $0.011 \text{ \AA}^{-1}$  which suggested the presence of another morphology in the solution. Analysis of the data using a spherical fit did not provide a good correlation at low  $q$  but did provide better correlation at high  $q$ . Thus a sum model was created to better model the system through the transition from cylinder to sphere. The better chi square values (data not shown) for the sum model (over either cylinder or sphere model alone) indicate a better fit overall to this model. <sup>b</sup> The scale ratio given by the sum model cannot be used as a ratio between the number of particles of each morphologies. It is related to the volume fraction of each morphology, and thus it is possible to observe trends in the evolution of the comparison of these two numbers.

**Supplementary Table 3.** Different parameters of the fitted SAXS profiles given in Supplementary Figure 12. The initial time point experiment profile ( $t = 0$  h) has been fitted with a cylinder model, all the other ones with the sum model

| time (h) | length of cylinder (nm) | radius of cylinder (nm) | radius of sphere (nm) | scale ratio of cylinder:sphere <sup>a</sup> |
|----------|-------------------------|-------------------------|-----------------------|---------------------------------------------|
| 0        | 190 ± 2                 | 17 ± 1                  | —                     | —                                           |
| 5        | 183 ± 2                 | 17 ± 0                  | 19.2 ± 0.2            | 1:0.7                                       |
| 16       | 193 ± 7                 | 17 ± 0                  | 18.2 ± 0.7            | 1:0.8                                       |
| 45       | 147 ± 1                 | 17 ± 0                  | 16.5 ± 0.2            | 1:3.1                                       |
| 90       | 128 ± 6                 | 17 ± 0                  | 14.8 ± 0.5            | 1:3.8                                       |
| 120      | 62 ± 4                  | 17 ± 0                  | 14.0 ± 0.7            | 1:12.5                                      |

<sup>a</sup> The scale ratio given by the sum model cannot be used as a ratio between the number of particles of each morphologies. It is related to the volume fraction of each morphology, and thus it is possible to observe trends in the evolution of the comparison of these two numbers.

**Supplementary Figure 4.** Different parameters of the fitted SAXS profiles given in Supplementary Figure 17 using a “cylinder polyradius” model. As fits were not valuable after 90 h, a simpler model “Guinier-Porod” was used to provide information on the general shape of the assemblies

| time (h) | length of cylinder (nm) | radius of cylinder (nm) | dimensionality parameter <sup>a</sup> | shape <sup>a</sup> |
|----------|-------------------------|-------------------------|---------------------------------------|--------------------|
| 0        | 255 ± 4                 | 19 ± 0.0                | 2.16                                  | Rod                |
| 5        | 254 ± 5                 | 19 ± 0.0                | 2.09                                  | Rod                |
| 10       | 275 ± 2                 | 19 ± 0.0                | 2.09                                  | Rod                |
| 16       | 256 ± 4                 | 19 ± 0.0                | 2.05                                  | Rod                |
| 24       | 272 ± 3                 | 19 ± 0.0                | 1.96                                  | Rod                |
| 45       | 277 ± 4                 | 19 ± 0.0                | 1.94                                  | Rod                |
| 63       | 240 ± 3                 | 19 ± 0.0                | 1.86                                  | Rod                |
| 90       | 1853 ± 69               | 19 ± 0.0                | 1.81                                  | Rod+plate          |
| 120      | 2028 ± 65               | 19 ± 0.0                | 1.77                                  | Rod+plate          |

<sup>a</sup> The dimensionality parameter is calculated as  $3-s$  and is 3 for spherical objects, 2 for rods and 1 for plates. These values are obtained with a Guinier-Porod model.

**Supplementary Table 5.** Different parameters of the fitted SAXS profiles given in Supplementary Figure 19 using the Guinier-Porod model

| time (h) | $R_g$ (nm) | dimensionality parameter <sup>a</sup> | shape <sup>a</sup> |
|----------|------------|---------------------------------------|--------------------|
| 0        | 16 ± 0.1   | 2.12                                  | Rod                |
| 1        | 12 ± 0.1   | 1.97                                  | Rod                |
| 5        | 15 ± 0.1   | 1.88                                  | Rod+Plate          |
| 16       | 15 ± 0.1   | 1.81                                  | Rod+Plate          |
| 24       | 16 ± 0.1   | 1.70                                  | Rod+Plate          |
| 40       | 17 ± 0.1   | 1.60                                  | Rod+Plate          |

<sup>a</sup> The dimensionality parameter is calculated as  $3-s$  and is 3 for spherical objects, 2 for rods and 1 for plates.
